# Supplementary material
Source: PubMed Central journal article supplement (PMC3074344)
Supplement: NIHMS270641-supplement-1.pdf [file NIHMS270641-supplement-1.pdf]

# Supplement Material

## Supplemental Figure I

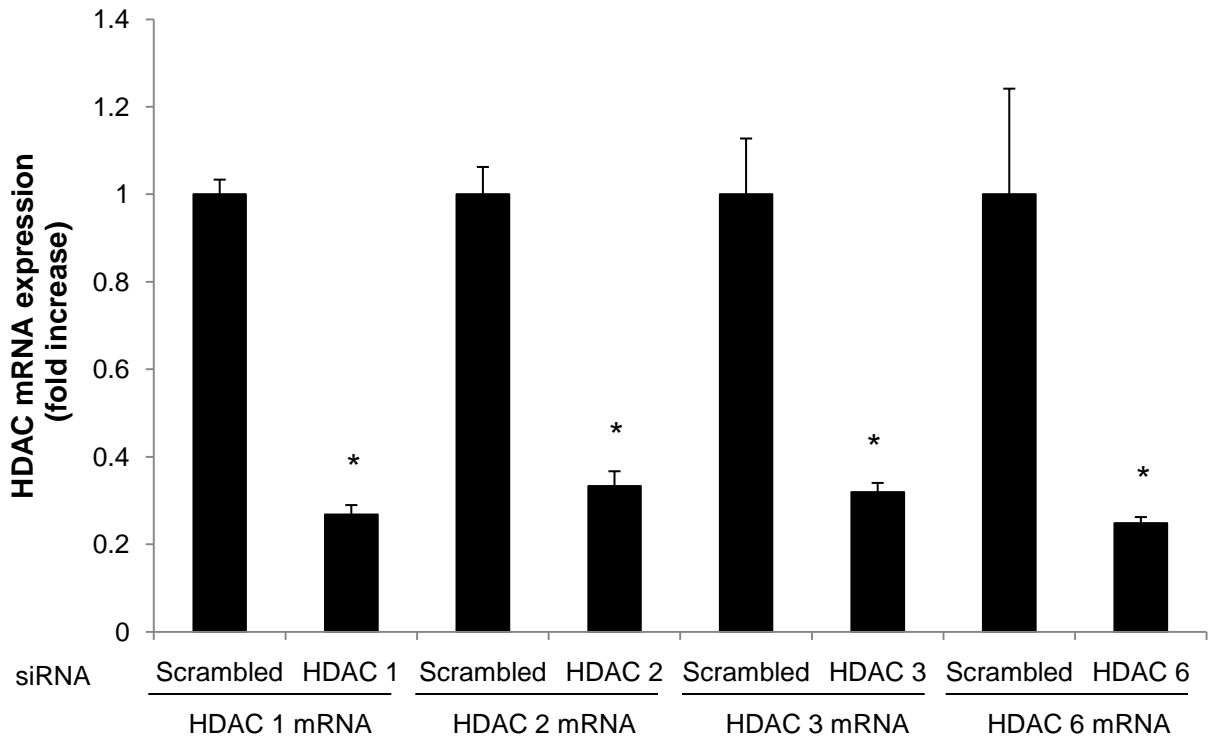

Supplemental Figure I: siRNA mediated knock down of HDAC mRNA expression: SMC were transfected twice with siRNA against HDAC 1, 2, 3, 6 or scrambled siRNA. Knock down efficiency was confirmed after 48 h using real-time RT-PCR (\*  $p < 0.05$  vs. scrambled).

## Supplemental Figure II

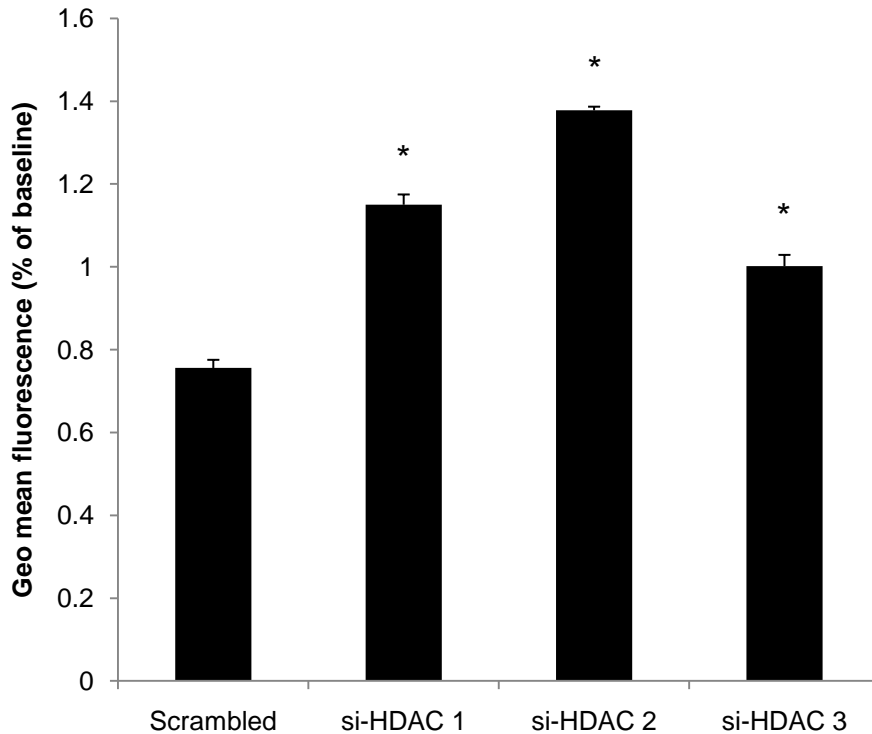

Supplemental Figure II: Knock down of class I HDACs inhibits SMC proliferation. Cells were transfected twice with siRNA against HDAC 1, 2, 3, stained with CFSE, and serum-deprived for 24 h. Following this starvation period, synchronized cells were stimulated with 10 % FBS for 72 h and analyzed by FACS. Note, CFSE mean fluorescence declines with cell division, and geometric mean fluorescence is inversely proportional to the proliferation rate. Data is presented as mean  $\pm$  SEM (\*  $p < 0.05$  vs. scrambled).

### Supplemental Figure III

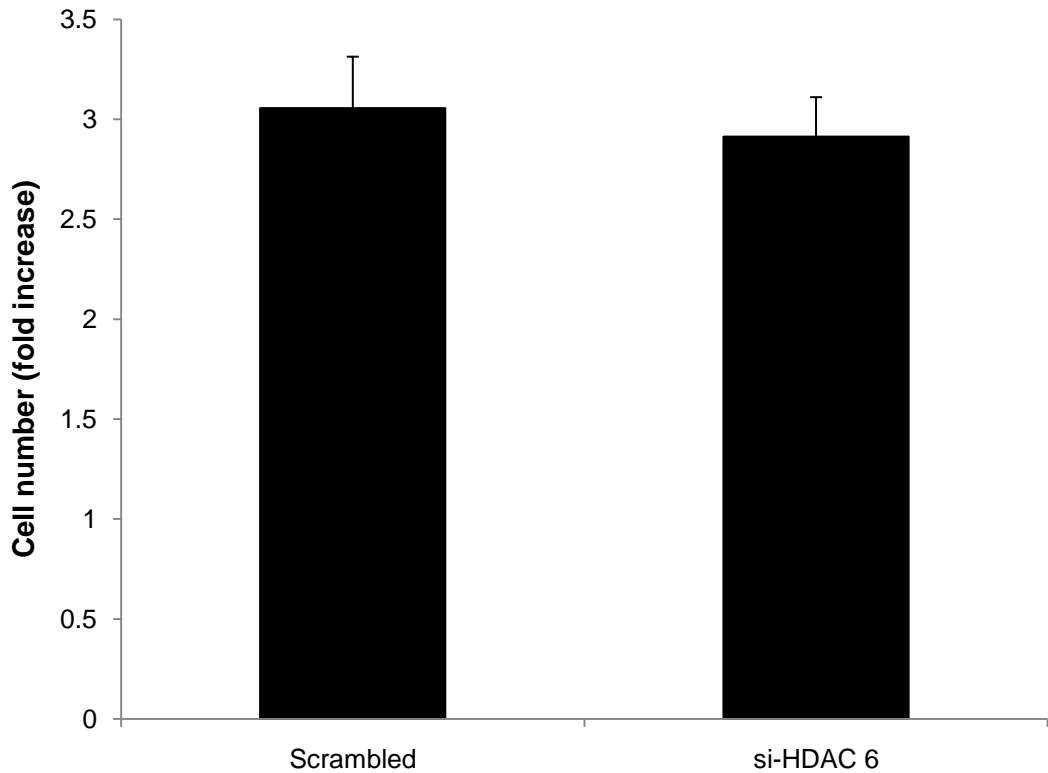

Supplemental Figure III: Normal proliferation following knock down of HDAC 6. Cells were transfected twice with siRNA against HDAC 6 or scrambled siRNA and serum-deprived for 24 h. Following this starvation period, synchronized cells were stimulated with 10 % FBS for 48 h and counted using a hemocytometer. Data is presented as mean SEM with

## Supplemental Figure IV

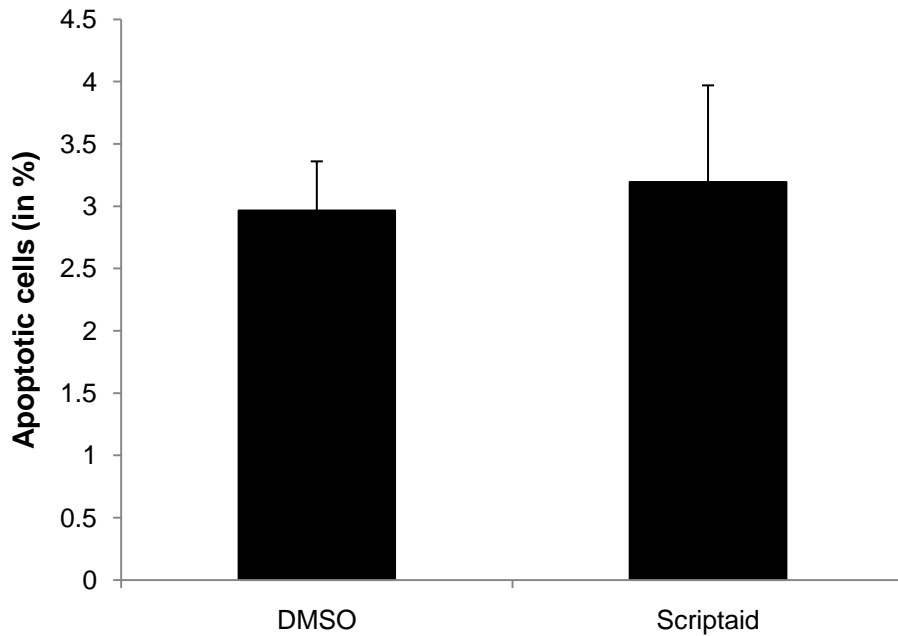

Supplemental Figure IV: Scriptaid does not induce apoptosis in SMC. Serum-deprived SMC were pretreated with DMSO or 6  $\mu$ M Scriptaid, and stimulated with 10% FBS. Apoptosis was analyzed after 24 h cells using FACS.

## Supplemental Figure V

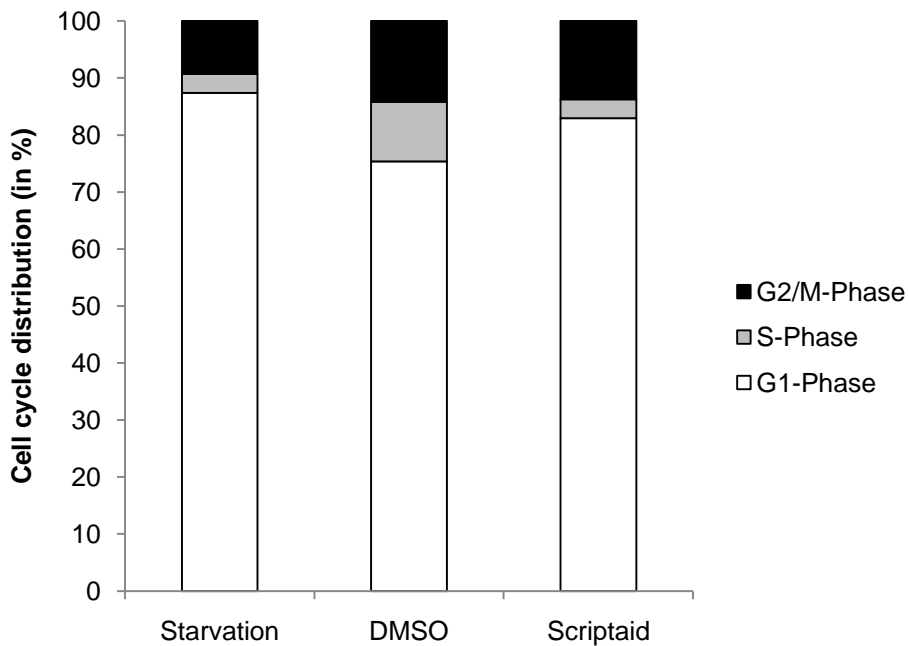

Supplemental Figure V: Scriptaid prevents cell cycle progression in PDGF-stimulated SMC. Serum-deprived SMC were pretreated with DMSO or 6  $\mu$ M Scriptaid and stimulated with 50 ng/ml PDGF. Cell cycle distribution was assessed at baseline and 24 h after PDGF stimulation using FACS analysis.

## Supplemental Figure VI

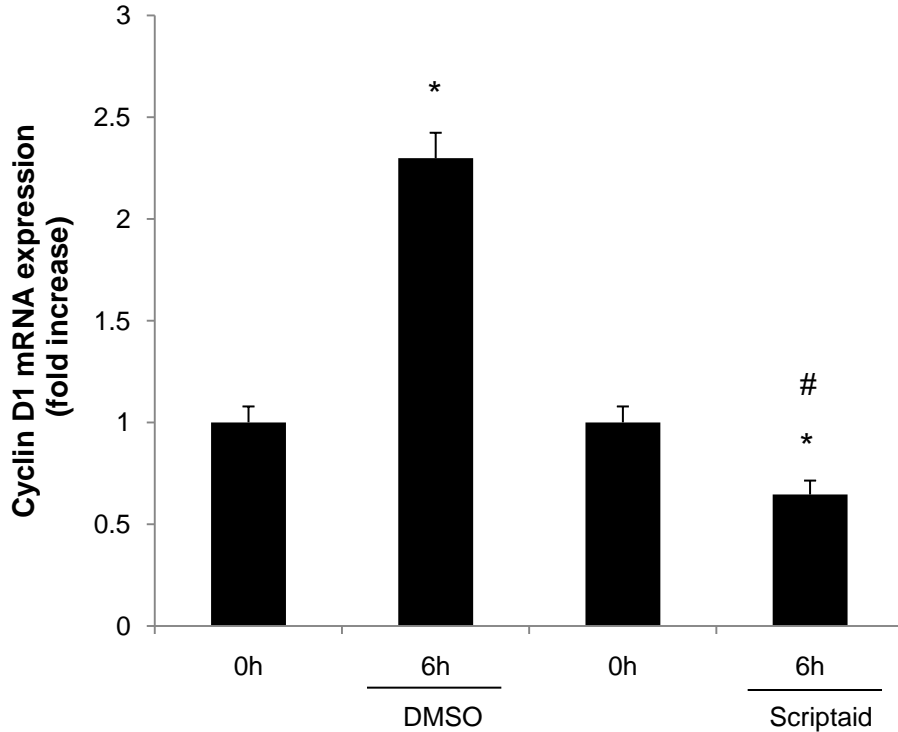

Supplemental Figure VI: Scriptaid represses cyclin D1 transcription in PDGF stimulated SMC. Serum-deprived SMC were pretreated with DMSO or 6  $\mu$ M Scriptaid, and stimulated with 50 ng/ml PDGF. Cyclin D1 mRNA expression was analyzed after 6 h using real-time RT-PCR. Data is presented as mean  $\pm$  SEM (\*  $p < 0.05$  vs. baseline, #  $p < 0.05$  vs. DMSO).

## Supplemental Figure VII

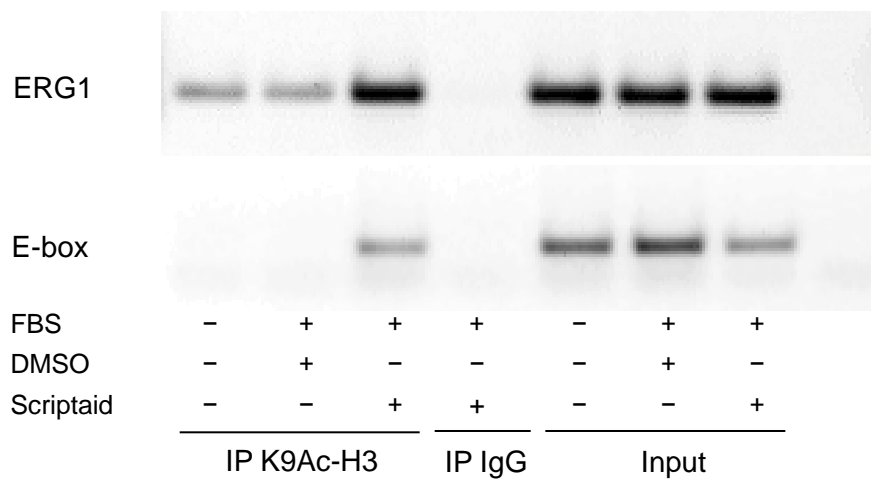

Supplemental Figure VII: Scriptaid induces histone H3 acetylation at the cyclin D1 promoter. Serum-deprived SMC were pretreated with DMSO or 6  $\mu$ M Scriptaid, and stimulated with 10% FBS. Chromatin was collected after 2 h for ChIP assays. After chromatin immunoprecipitation using an antibody against histone H3 acetylated at lysine 9, PCR analysis was performed with primer pairs that cover the E-box or EGR1 binding site in the rat cyclin D1 promoter.

## Supplemental Figure VIII

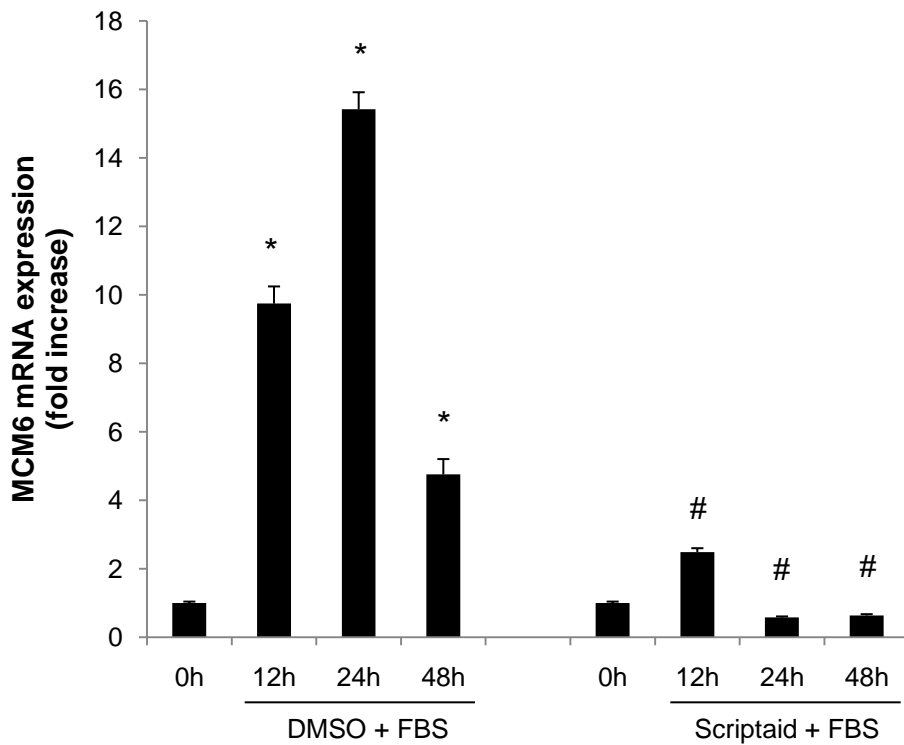

Supplemental Figure VIII: HDAC inhibition results in silencing of Rb/E2F target genes. Serum-deprived SMC were treated with DMSO or 6  $\mu$ M Scriptaid, and stimulated with 10% FBS. Cells were harvested at the indicated time points and analyzed for mRNA expression of MCM6 and Cyclin A. Data is presented as mean  $\pm$  SEM (\*  $p < 0.05$  vs. baseline, #  $p < 0.05$  vs. DMSO).



## Supplemental Figure IX

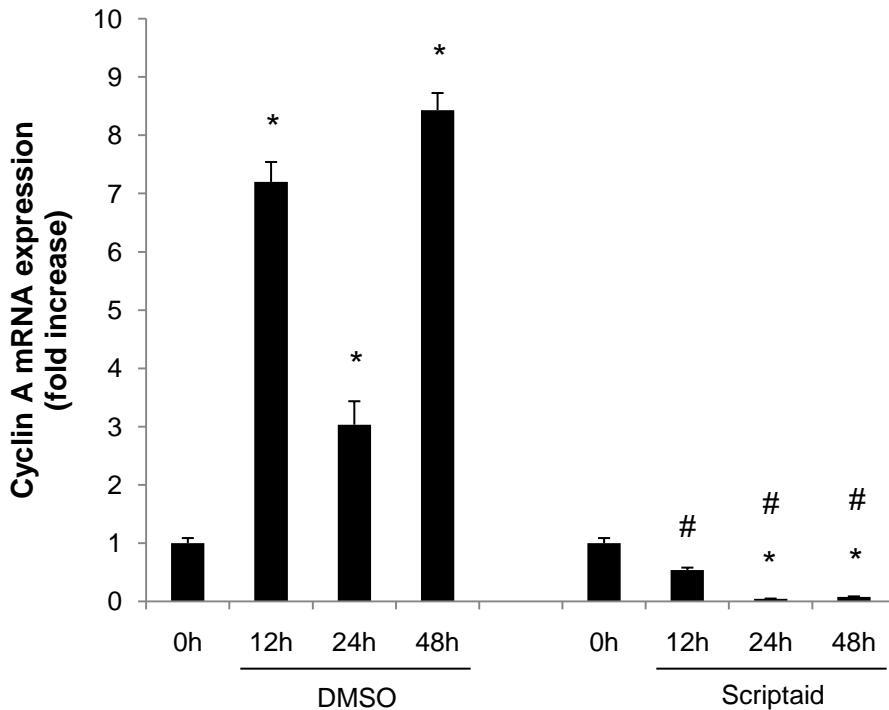

Supplemental Figure IX: HDAC inhibition results in silencing of Rb/E2F target genes. Serum-deprived SMC were treated with DMSO or 6  $\mu$ M Scriptaid, and stimulated with 10% FBS. Cells were harvested at the indicated time points and analyzed for mRNA expression of MCM6 and Cyclin A. Data is presented as mean  $\pm$  SEM (\*  $p < 0.05$  vs. baseline, #  $p < 0.05$  vs. DMSO).

## Supplemental Table I

**Supplemental Table 1. Morphological Analysis of Mouse Femoral Arteries**

|                               | DMSO             | Scriptaid        | p-value |
|-------------------------------|------------------|------------------|---------|
| Vessel size, $\mu\text{m}^2$  | 49149 $\pm$ 4115 | 50619 $\pm$ 2868 | 0.77    |
| Luminal area, $\mu\text{m}^2$ | 28152 $\pm$ 3624 | 32473 $\pm$ 4531 | 0.46    |
| Intimal area, $\mu\text{m}^2$ | 12554 $\pm$ 2001 | 8225 $\pm$ 2272  | 0.17    |
| Medial area, $\mu\text{m}^2$  | 8443 $\pm$ 684   | 9919 $\pm$ 725   | 0.16    |
| Intima/media ratio            | 1.55 $\pm$ 0.26  | 0.75 $\pm$ 0.18  | 0.02*   |
